# Supplementary material
Source: MDPI journal article supplement (https://www.mdpi.com/2297-8739/9/11/328)
Supplement: s1 [file s1]

Archive with 2 entries (2 files):
- Supplementary_Material_Reinstadler_Separations_2022_Methods_revised.pdf
- Supplementary_Material_Reinstadler_Separations_2022_Tables_S1_S2_revised.xlsx
