# Supplementary material
Source: MDPI journal article supplement (https://www.mdpi.com/2297-8739/9/11/328)
Supplement: s1 [file s1 › Supplementary_Material_Reinstadler_Separations_2022_Tables_S1_S2_revised.xlsx]

## Sheet: General
Additional file to the manuscript
Gas Chromatography – High-Temperature Proton-Transfer Re-action Mass Spectrometry as Novel Tool for Forensic Drug Testing
Vera Reinstadler, Rene Gutmann, Florian Pitterl, Klaus Winkler, Herbert Oberacher
The following tables are include in this file:
Table S1: Reference compounds used for determining the detection capabilities of GC-HT-PTR-MS.
Table S2: Reference compounds used for additional compound annotation in plasma samples.

## Sheet: S1_Reference_standards
Table S1: Reference compounds used for determining the detection capabilities of GC-HT-PTR-MS.
Name	IUPAC Name	CAS_RN	InChIKey	Standard InChI	SMILES	Molecular Formula
11-Hydroxy-Δ9-tetrahydrocannabinol (11-Hydroxy-THC)	(6aR,10aR)-9-(Hydroxymethyl)-6,6-dimethyl-3-pentyl-6a,7,8,10a-tetrahydrobenzo[c]chromen-1-ol	36557-05-8	YCBKSSAWEUDACY-IAGOWNOFSA-N	InChI=1S/C21H30O3/c1-4-5-6-7-14-11-18(23)20-16-10-15(13-22)8-9-17(16)21(2,3)24-19(20)12-14/h10-12,16-17,22-23H,4-9,13H2,1-3H3/t16-,17-/m1/s1	CCCCCC1=CC(=C2C3C=C(CCC3C(OC2=C1)(C)C)CO)O	C21H30O3
2-Ethylidene-1,5-dimethyl-3,3-diphenylpyrrolidine (EDDP)	2-Ethylidene-1,5-dimethyl-3,3-diphenylpyrrolidine	30223-73-5	AJRJPORIQGYFMT-RMOCHZDMSA-N	InChI=1S/C20H23N/c1-4-19-20(15-16(2)21(19)3,17-11-7-5-8-12-17)18-13-9-6-10-14-18/h4-14,16H,15H2,1-3H3/b19-4+	CC=C1C(CC(N1C)C)(C2=CC=CC=C2)C3=CC=CC=C3	C20H23N
3,4-Methylenedioxyamphetamine (MDA)	1-(1,3-Benzodioxol-5-yl)propan-2-amine	4764-17-4	NGBBVGZWCFBOGO-UHFFFAOYSA-N	InChI=1S/C10H13NO2/c1-7(11)4-8-2-3-9-10(5-8)13-6-12-9/h2-3,5,7H,4,6,11H2,1H3	CC(CC1=CC2=C(C=C1)OCO2)N	C10H13NO2
3,4-Methylenedioxymethamphetamine (MDMA)	1-(1,3-Benzodioxol-5-yl)-N-methylpropan-2-amine	42542-10-9	SHXWCVYOXRDMCX-UHFFFAOYSA-N	InChI=1S/C11H15NO2/c1-8(12-2)5-9-3-4-10-11(6-9)14-7-13-10/h3-4,6,8,12H,5,7H2,1-2H3	CC(CC1=CC2=C(C=C1)OCO2)NC	C11H15NO2
6-O-Monoacetylmorphine	3-Hydroxy-17-methyl-5alpha-7,8-didehydro-4,5-epoxymorphinan-6alpha-yl acetate	2784-73-8	JJGYGPZNTOPXGV-SSTWWWIQSA-N	InChI=1S/C19H21NO4/c1-10(21)23-15-6-4-12-13-9-11-3-5-14(22)17-16(11)19(12,18(15)24-17)7-8-20(13)2/h3-6,12-13,15,18,22H,7-9H2,1-2H3/t12-,13+,15-,18-,19-/m0/s1	[H]C12CC3=C4C(OC5C(OC(C)=O)C=CC1C45CCN2C)=C(O)C=C3	C19H21NO4
7-Aminoflunitrazepam	7-Amino-5-(2-fluorophenyl)-1-methyl-1,3-dihydro-2H-1,4-benzodiazepin-2-one	34084-50-9	LTCDLGUFORGHGY-UHFFFAOYSA-N	InChI=1S/C16H14FN3O/c1-20-14-7-6-10(18)8-12(14)16(19-9-15(20)21)11-4-2-3-5-13(11)17/h2-8H,9,18H2,1H3	CN1C2=C(C=C(N)C=C2)C(=NCC1=O)C1=CC=CC=C1F	C16H14FN3O
Δ9-Tetrahydrocannabinol (THC)	(6aR,10aR)-6,6,9-Trimethyl-3-pentyl-6a,7,8,10a-tetrahydrobenzo[c]chromen-1-ol	1972-08-3	CYQFCXCEBYINGO-IAGOWNOFSA-N	InChI=1S/C21H30O2/c1-5-6-7-8-15-12-18(22)20-16-11-14(2)9-10-17(16)21(3,4)23-19(20)13-15/h11-13,16-17,22H,5-10H2,1-4H3/t16-,17-/m1/s1	CCCCCC1=CC(=C2C3C=C(CCC3C(OC2=C1)(C)C)C)O	C21H30O2
Acetaminophen	N-(4-Hydroxyphenyl)acetamide	103-90-2	RZVAJINKPMORJF-UHFFFAOYSA-N	InChI=1S/C8H9NO2/c1-6(10)9-7-2-4-8(11)5-3-7/h2-5,11H,1H3,(H,9,10)	CC(=O)NC1=CC=C(C=C1)O	C8H9NO2
Alprazolam	8-Chloro-1-methyl-6-phenyl-4H-[1,2,4]triazolo[4,3-a][1,4]benzodiazepine	28981-97-7	VREFGVBLTWBCJP-UHFFFAOYSA-N	InChI=1S/C17H13ClN4/c1-11-20-21-16-10-19-17(12-5-3-2-4-6-12)14-9-13(18)7-8-15(14)22(11)16/h2-9H,10H2,1H3	CC1=NN=C2CN=C(C3=CC=CC=C3)C3=CC(Cl)=CC=C3N12	C17H13ClN4
Amantadine	1-Tricyclo[3.3.1.13,7]decylamin	768-94-5	DKNWSYNQZKUICI-UHFFFAOYSA-N	InChI=1S/C10H17N/c11-10-4-7-1-8(5-10)3-9(2-7)6-10/h7-9H,1-6,11H2	NC12CC3CC(CC(C3)C1)C2	C10H17N
Amitryptiline	N,N-Dimethyl-3-(2-tricyclo[9.4.0.03,8]pentadeca-1(15),3,5,7,11,13-hexaenylidene)propan-1-amine	50-48-6	KRMDCWKBEZIMAB-UHFFFAOYSA-N	InChI=1S/C20H23N/c1-21(2)15-7-12-20-18-10-5-3-8-16(18)13-14-17-9-4-6-11-19(17)20/h3-6,8-12H,7,13-15H2,1-2H3	CN(C)CCC=C1C2=CC=CC=C2CCC3=CC=CC=C31	C20H23N
Amlodipine	3-Ethyl 5-methyl 2-[(2-aminoethoxy)methyl]-4-(2-chlorophenyl)-6-methyl-1,4-dihydropyridine-3,5-dicarboxylate	88150-42-9	HTIQEAQVCYTUBX-UHFFFAOYSA-N	InChI=1/C20H25ClN2O5/c1-4-28-20(25)18-15(11-27-10-9-22)23-12(2)16(19(24)26-3)17(18)13-7-5-6-8-14(13)21/h5-8,17,23H,4,9-11,22H2,1-3H3	CCOC(=O)C1C(C2=CC=CC=C2Cl)C(C(=O)OC)=C(C)N=C1COCCN	C20H25ClN2O5
Amphetamine	1-Phenylpropan-2-amine	300-62-9	KWTSXDURSIMDCE-UHFFFAOYSA-N	InChI=1/C9H13N/c1-8(10)7-9-5-3-2-4-6-9/h2-6,8H,7,10H2,1H3	CC(N)CC1=CC=CC=C1	C9H13N
Atropine	(1R,3r,5S)-8-Methyl-8-azabicyclo[3.2.1]octan-3-yl 3-hydroxy-2-phenylpropanoate	51-55-8	RKUNBYITZUJHSG-SPUOUPEWSA-N	InChI=1S/C17H23NO3/c1-18-13-7-8-14(18)10-15(9-13)21-17(20)16(11-19)12-5-3-2-4-6-12/h2-6,13-16,19H,7-11H2,1H3/t13-,14+,15+,16?	[H]C12CCC([H])(CC(C1)OC(=O)C(CO)C1=CC=CC=C1)N2C	C17H23NO3
Biperiden	1-(Bicyclo[2.2.1]hept-5-en-2-yl)-1-phenyl-3-(piperidin-1-yl)propan-1-ol	514-65-8	YSXKPIUOCJLQIE-UHFFFAOYSA-N	InChI=1/C21H29NO/c23-21(19-7-3-1-4-8-19,11-14-22-12-5-2-6-13-22)20-16-17-9-10-18(20)15-17/h1,3-4,7-10,17-18,20,23H,2,5-6,11-16H2	OC(CCN1CCCCC1)(C1CC2CC1C=C2)C1=CC=CC=C1	C21H29NO
Bisacodyl	[(Pyridin-2-yl)methylene]di(4,1-phenylene) diacetate	603-50-9	KHOITXIGCFIULA-UHFFFAOYSA-N	InChI=1S/C22H19NO4/c1-15(24)26-19-10-6-17(7-11-19)22(21-5-3-4-14-23-21)18-8-12-20(13-9-18)27-16(2)25/h3-14,22H,1-2H3	CC(=O)OC1=CC=C(C=C1)C(C1=CC=C(OC(C)=O)C=C1)C1=NC=CC=C1	C22H19NO4
Bisoprolol	1-[(Propan-2-yl)amino]-3-[4-({2-[(propan-2-yl)oxy]ethoxy}methyl)phenoxy]propan-2-ol	66722-44-9	VHYCDWMUTMEGQY-UHFFFAOYSA-N	InChI=1/C18H31NO4/c1-14(2)19-11-17(20)13-23-18-7-5-16(6-8-18)12-21-9-10-22-15(3)4/h5-8,14-15,17,19-20H,9-13H2,1-4H3	CC(C)NCC(O)COC1=CC=C(COCCOC(C)C)C=C1	C18H31NO4
Bromazepam	7-Bromo-5-(pyridin-2-yl)-1,3-dihydro-2H-1,4-benzodiazepin-2-one	1812-30-2	VMIYHDSEFNYJSL-UHFFFAOYSA-N	InChI=1S/C14H10BrN3O/c15-9-4-5-11-10(7-9)14(17-8-13(19)18-11)12-3-1-2-6-16-12/h1-7H,8H2,(H,18,19)	BrC1=CC2=C(NC(=O)CN=C2C2=CC=CC=N2)C=C1	C14H10BrN3O
Buprenorphine	(1S,2S,6R,14R,15R,16R)-5-(cyclopropylmethyl)-16-[(2S)-2-hydroxy-3,3-dimethylbutan-2-yl]-15-methoxy-13-oxa-5-azahexacyclo[13.2.2.12,8.01,6.02,14.012,20]icosa-8(20),9,11-trien-11-ol	52485-79-7	RMRJXGBAOAMLHD-IHFGGWKQSA-N	InChI=1S/C29H41NO4/c1-25(2,3)26(4,32)20-15-27-10-11-29(20,33-5)24-28(27)12-13-30(16-17-6-7-17)21(27)14-18-8-9-19(31)23(34-24)22(18)28/h8-9,17,20-21,24,31-32H,6-7,10-16H2,1-5H3/t20-,21-,24-,26+,27-,28+,29-/m1/s1	CC(C)(C)C(C)(C1CC23CCC1(C4C25CCN(C3CC6=C5C(=C(C=C6)O)O4)CC7CC7)OC)O	C29H41NO4
Bupropion	2-(Tert-butylamino)-1-(3-chlorophenyl)propan-1-one	34911-55-2	SNPPWIUOZRMYNY-UHFFFAOYSA-N	InChI=1S/C13H18ClNO/c1-9(15-13(2,3)4)12(16)10-6-5-7-11(14)8-10/h5-9,15H,1-4H3	CC(C(=O)C1=CC(=CC=C1)Cl)NC(C)(C)C	C13H18ClNO
Cafedrine	7-{2-[(1-Hydroxy-1-phenylpropan-2-yl)amino]ethyl}-1,3-dimethyl-3,7-dihydro-1H-purine-2,6-dione	58166-83-9	UJSKUDDDPKGBJY-UHFFFAOYSA-N	InChI=1/C18H23N5O3/c1-12(15(24)13-7-5-4-6-8-13)19-9-10-23-11-20-16-14(23)17(25)22(3)18(26)21(16)2/h4-8,11-12,15,19,24H,9-10H2,1-3H3	CC(NCCN1C=NC2=C1C(=O)N(C)C(=O)N2C)C(O)C1=CC=CC=C1	C18H23N5O3
Chlorprothixene	(3E)-3-(2-Chloro-9H-thioxanthen-9-ylidene)-N,N-dimethylpropan-1-amine	113-59-7	WSPOMRSOLSGNFJ-AUWJEWJLSA-N	InChI=1S/C18H18ClNS/c1-20(2)11-5-7-14-15-6-3-4-8-17(15)21-18-10-9-13(19)12-16(14)18/h3-4,6-10,12H,5,11H2,1-2H3/b14-7-	CN(C)CCC=C1C2=CC=CC=C2SC3=C1C=C(C=C3)Cl	C18H18ClNS
Citalopram	1-[3-(Dimethylamino)propyl]-1-(4-fluorophenyl)-1,3-dihydro-2-benzofuran-5-carbonitrile	59729-33-8	WSEQXVZVJXJVFP-UHFFFAOYSA-N	InChI=1/C20H21FN2O/c1-23(2)11-3-10-20(17-5-7-18(21)8-6-17)19-9-4-15(13-22)12-16(19)14-24-20/h4-9,12H,3,10-11,14H2,1-2H3	CN(C)CCCC1(OCC2=CC(=CC=C12)C#N)C1=CC=C(F)C=C1	C20H21FN2O
Clozapine	3-chloro-6-(4-methylpiperazin-1-yl)-11H-benzo[b][1,4]benzodiazepine	5786-21-0	QZUDBNBUXVUHMW-UHFFFAOYSA-N	InChI=1S/C18H19ClN4/c1-22-8-10-23(11-9-22)18-14-4-2-3-5-15(14)20-16-7-6-13(19)12-17(16)21-18/h2-7,12,20H,8-11H2,1H3	CN1CCN(CC1)C2=NC3=C(C=CC(=C3)Cl)NC4=CC=CC=C42	C18H19ClN4
Clobazam	7-Chloro-1-methyl-5-phenyl-1H-1,5-benzodiazepine-2,4(3H,5H)-dione	22316-47-8	CXOXHMZGEKVPMT-UHFFFAOYSA-N	InChI=1S/C16H13ClN2O2/c1-18-13-8-7-11(17)9-14(13)19(16(21)10-15(18)20)12-5-3-2-4-6-12/h2-9H,10H2,1H3	CN1C2=CC=C(Cl)C=C2N(C2=CC=CC=C2)C(=O)CC1=O	C16H13ClN2O2
Clomipramine	3-(3-Chloro-10,11-dihydro-5H-dibenzo[b,f]azepin-5-yl)-N,N-dimethylpropan-1-amine	303-49-1	GDLIGKIOYRNHDA-UHFFFAOYSA-N	InChI=1S/C19H23ClN2/c1-21(2)12-5-13-22-18-7-4-3-6-15(18)8-9-16-10-11-17(20)14-19(16)22/h3-4,6-7,10-11,14H,5,8-9,12-13H2,1-2H3	CN(C)CCCN1C2=CC=CC=C2CCC2=CC=C(Cl)C=C12	C19H23ClN2
Cocaine	Methyl (1R,2R,3S,5S)-3-(benzoyloxy)-8-methyl-8-azabicyclo[3.2.1]octane-2-carboxylate	50-36-2	ZPUCINDJVBIVPJ-LJISPDSOSA-N	InChI=1S/C17H21NO4/c1-18-12-8-9-13(18)15(17(20)21-2)14(10-12)22-16(19)11-6-4-3-5-7-11/h3-7,12-15H,8-10H2,1-2H3/t12-,13+,14-,15+/m0/s1	CN1C2CCC1C(C(C2)OC(=O)C3=CC=CC=C3)C(=O)OC	C17H21NO4
Codeine	3-Methoxy-17-methyl-5alpha-7,8-didehydro-4,5-epoxymorphinan-6alpha-ol	76-57-3	OROGSEYTTFOCAN-DNJOTXNNSA-N	InChI=1S/C18H21NO3/c1-19-8-7-18-11-4-5-13(20)17(18)22-16-14(21-2)6-3-10(15(16)18)9-12(11)19/h3-6,11-13,17,20H,7-9H2,1-2H3/t11-,12+,13-,17-,18-/m0/s1	[H]C12CC3=C4C(OC5C(O)C=CC1C45CCN2C)=C(OC)C=C3	C18H21NO3
Cyclobenzaprine	3-(5H-Dibenzo[a,d][7]annulen-5-ylidene)-N,N-dimethylpropan-1-amine	303-53-7	JURKNVYFZMSNLP-UHFFFAOYSA-N	InChI=1S/C20H21N/c1-21(2)15-7-12-20-18-10-5-3-8-16(18)13-14-17-9-4-6-11-19(17)20/h3-6,8-14H,7,15H2,1-2H3	CN(C)CCC=C1C2=C(C=CC=C2)C=CC2=C1C=CC=C2	C20H21N
Dextromethorphan	(1S,9S,10S)-4-methoxy-17-methyl-17-azatetracyclo[7.5.3.01,10.02,7]heptadeca-2(7),3,5-triene	125-71-3	MKXZASYAUGDDCJ-NJAFHUGGSA-N	InChI=1S/C18H25NO/c1-19-10-9-18-8-4-3-5-15(18)17(19)11-13-6-7-14(20-2)12-16(13)18/h6-7,12,15,17H,3-5,8-11H2,1-2H3/t15-,17+,18+/m1/s1	CN1CCC23CCCCC2C1CC4=C3C=C(C=C4)OC	C18H25NO
Diazepam	7-Chloro-1-methyl-5-phenyl-1,3-dihydro-2H-1,4-benzodiazepin-2-one	439-14-5	AAOVKJBEBIDNHE-UHFFFAOYSA-N	InChI=1S/C16H13ClN2O/c1-19-14-8-7-12(17)9-13(14)16(18-10-15(19)20)11-5-3-2-4-6-11/h2-9H,10H2,1H3	CN1C2=C(C=C(Cl)C=C2)C(=NCC1=O)C1=CC=CC=C1	C16H13ClN2O
Diclofenac	[2-(2,6-Dichloroanilino)phenyl]acetic acid	15307-86-5	DCOPUUMXTXDBNB-UHFFFAOYSA-N	InChI=1S/C14H11Cl2NO2/c15-10-5-3-6-11(16)14(10)17-12-7-2-1-4-9(12)8-13(18)19/h1-7,17H,8H2,(H,18,19)	OC(=O)CC1=C(NC2=C(Cl)C=CC=C2Cl)C=CC=C1	C14H11Cl2NO2
Dihydrocodeine	3-Methoxy-17-methyl-5alpha-4,5-epoxymorphinan-6alpha-ol	125-28-0	RBOXVHNMENFORY-DNJOTXNNSA-N	InChI=1S/C18H23NO3/c1-19-8-7-18-11-4-5-13(20)17(18)22-16-14(21-2)6-3-10(15(16)18)9-12(11)19/h3,6,11-13,17,20H,4-5,7-9H2,1-2H3/t11-,12+,13-,17-,18-/m0/s1	COC1=C2OC3C(O)CCC4C5CC(C=C1)=C2C34CCN5C	C18H23NO3
Diphenhydramine	2-(Diphenylmethoxy)-N,N-dimethylethan-1-amine	58-73-1	ZZVUWRFHKOJYTH-UHFFFAOYSA-N	InChI=1S/C17H21NO/c1-18(2)13-14-19-17(15-9-5-3-6-10-15)16-11-7-4-8-12-16/h3-12,17H,13-14H2,1-2H3	CN(C)CCOC(C1=CC=CC=C1)C1=CC=CC=C1	C17H21NO
Dothiepin	3-(Dibenzo[b,e]thiepin-11(6H)-ylidene)-N,N-dimethylpropan-1-amine	113-53-1	PHTUQLWOUWZIMZ-UHFFFAOYSA-N	InChI=1S/C19H21NS/c1-20(2)13-7-11-17-16-9-4-3-8-15(16)14-21-19-12-6-5-10-18(17)19/h3-6,8-12H,7,13-14H2,1-2H3	CN(C)CCC=C1C2=CC=CC=C2CSC2=C1C=CC=C2	C19H21NS
Doxepin	(3E)-3-(Dibenzo[b,e]oxepin-11(6H)-ylidene)-N,N-dimethylpropan-1-amine	1668-19-5	ODQWQRRAPPTVAG-UHFFFAOYSA-N	InChI=1S/C19H21NO/c1-20(2)13-7-11-17-16-9-4-3-8-15(16)14-21-19-12-6-5-10-18(17)19/h3-6,8-12H,7,13-14H2,1-2H3	CN(C)CCC=C1C2=C(COC3=C1C=CC=C3)C=CC=C2	C19H21NO
Duloxetine	(3S)-N-Methyl-3-[(naphthalen-1-yl)oxy]-3-(thiophen-2-yl)propan-1-amine	116539-59-4	ZEUITGRIYCTCEM-KRWDZBQOSA-N	InChI=1S/C18H19NOS/c1-19-12-11-17(18-10-5-13-21-18)20-16-9-4-7-14-6-2-3-8-15(14)16/h2-10,13,17,19H,11-12H2,1H3/t17-/m0/s1	CNCCC(OC1=C2C=CC=CC2=CC=C1)C1=CC=CS1	C18H19NOS
Etilefrine	3-[2-(Ethylamino)-1-hydroxyethyl]phenol	709-55-7	SQVIAVUSQAWMKL-UHFFFAOYSA-N	InChI=1/C10H15NO2/c1-2-11-7-10(13)8-4-3-5-9(12)6-8/h3-6,10-13H,2,7H2,1H3	CCNCC(O)C1=CC=CC(O)=C1	C10H15NO2
Etofylline	7-(2-Hydroxyethyl)-1,3-dimethyl-3,7-dihydro-1H-purine-2,6-dione	519-37-9	NWPRCRWQMGIBOT-UHFFFAOYSA-N	InChI=1S/C9H12N4O3/c1-11-7-6(8(15)12(2)9(11)16)13(3-4-14)5-10-7/h5,14H,3-4H2,1-2H3	CN1C2=C(N(CCO)C=N2)C(=O)N(C)C1=O	C9H12N4O3
Etomidate	Ethyl 1-(1-phenylethyl)-1H-imidazole-5-carboxylate	33125-97-2	NPUKDXXFDDZOKR-LLVKDONJSA-N	InChI=1S/C14H16N2O2/c1-3-18-14(17)13-9-15-10-16(13)11(2)12-7-5-4-6-8-12/h4-11H,3H2,1-2H3/t11-/m1/s1	CCOC(=O)C1=CN=CN1[C@H](C)C1=CC=CC=C1	C14H16N2O2
Fluconazole	2-(2,4-Difluorophenyl)-1,3-bis(1H-1,2,4-triazol-1-yl)propan-2-ol	86386-73-4	RFHAOTPXVQNOHP-UHFFFAOYSA-N	InChI=1S/C13H12F2N6O/c14-10-1-2-11(12(15)3-10)13(22,4-20-8-16-6-18-20)5-21-9-17-7-19-21/h1-3,6-9,22H,4-5H2	OC(CN1C=NC=N1)(CN1C=NC=N1)C1=C(F)C=C(F)C=C1	C13H12F2N6O
Flunitrazepam	5-(2-Fluorophenyl)-1-methyl-7-nitro-1,3-dihydro-2H-1,4-benzodiazepin-2-one	1622-62-4	PPTYJKAXVCCBDU-UHFFFAOYSA-N	InChI=1S/C16H12FN3O3/c1-19-14-7-6-10(20(22)23)8-12(14)16(18-9-15(19)21)11-4-2-3-5-13(11)17/h2-8H,9H2,1H3	CN1C2=C(C=C(C=C2)[N+]([O-])=O)C(=NCC1=O)C1=CC=CC=C1F	C16H12FN3O3
Fluoxetine	N-Methyl-3-phenyl-3-[4-(trifluoromethyl)phenoxy]propan-1-amine	54910-89-3	RTHCYVBBDHJXIQ-UHFFFAOYSA-N	InChI=1/C17H18F3NO/c1-21-12-11-16(13-5-3-2-4-6-13)22-15-9-7-14(8-10-15)17(18,19)20/h2-10,16,21H,11-12H2,1H3	CNCCC(OC1=CC=C(C=C1)C(F)(F)F)C1=CC=CC=C1	C17H18F3NO
Gabapentin	[1-(Aminomethyl)cyclohexyl]acetic acid	60142-96-3	UGJMXCAKCUNAIE-UHFFFAOYSA-N	InChI=1S/C9H17NO2/c10-7-9(6-8(11)12)4-2-1-3-5-9/h1-7,10H2,(H,11,12)	NCC1(CC(O)=O)CCCCC1	C9H17NO2
Gliclazide	N-[(Hexahydrocyclopenta[c]pyrrol-2(1H)-yl)carbamoyl]-4-methylbenzene-1-sulfonamide	21187-98-4	BOVGTQGAOIONJV-UHFFFAOYSA-N	InChI=1/C15H21N3O3S/c1-11-5-7-14(8-6-11)22(20,21)17-15(19)16-18-9-12-3-2-4-13(12)10-18/h5-8,12-13H,2-4,9-10H2,1H3,(H2,16,17,19)	CC1=CC=C(C=C1)S(=O)(=O)NC(=O)NN1CC2CCCC2C1	C15H21N3O3S
Heroin	[(4R,4aR,7S,7aR,12bS)-9-acetyloxy-3-methyl-2,4,4a,7,7a,13-hexahydro-1H-4,12-methanobenzofuro[3,2-e]isoquinolin-7-yl] acetate	561-27-3	GVGLGOZIDCSQPN-PVHGPHFFSA-N	InChI=1S/C21H23NO5/c1-11(23)25-16-6-4-13-10-15-14-5-7-17(26-12(2)24)20-21(14,8-9-22(15)3)18(13)19(16)27-20/h4-7,14-15,17,20H,8-10H2,1-3H3/t14-,15+,17-,20-,21-/m0/s1	CC(=O)OC1C=CC2C3CC4=C5C2(C1OC5=C(C=C4)OC(=O)C)CCN3C	C21H23NO5
Hydromorphone	3-Hydroxy-17-methyl-5alpha-4,5-epoxymorphinan-6-one	466-99-9	WVLOADHCBXTIJK-YNHQPCIGSA-N	InChI=1S/C17H19NO3/c1-18-7-6-17-10-3-5-13(20)16(17)21-15-12(19)4-2-9(14(15)17)8-11(10)18/h2,4,10-11,16,19H,3,5-8H2,1H3/t10-,11+,16-,17-/m0/s1	CN1CCC23C4C1CC5=C2C(=C(C=C5)O)OC3C(=O)CC4	C17H19NO3
Hydroxyzine	2-(2-{4-[(4-Chlorophenyl)(phenyl)methyl]piperazin-1-yl}ethoxy)ethan-1-ol	68-88-2	ZQDWXGKKHFNSQK-UHFFFAOYSA-N	InChI=1/C21H27ClN2O2/c22-20-8-6-19(7-9-20)21(18-4-2-1-3-5-18)24-12-10-23(11-13-24)14-16-26-17-15-25/h1-9,21,25H,10-17H2	OCCOCCN1CCN(CC1)C(C1=CC=CC=C1)C1=CC=C(Cl)C=C1	C21H27ClN2O2
Ibuprofen	2-[4-(2-Methylpropyl)phenyl]propanoic acid	15687-27-1	HEFNNWSXXWATRW-UHFFFAOYSA-N	InChI=1/C13H18O2/c1-9(2)8-11-4-6-12(7-5-11)10(3)13(14)15/h4-7,9-10H,8H2,1-3H3,(H,14,15)	CC(C)CC1=CC=C(C=C1)C(C)C(O)=O	C13H18O2
Indanazoline	N-(2,3-Dihydro-1H-inden-4-yl)-4,5-dihydro-1H-imidazol-2-amine	40507-78-6	KUCWWEPJRBANHL-UHFFFAOYSA-N	InChI=1S/C12H15N3/c1-3-9-4-2-6-11(10(9)5-1)15-12-13-7-8-14-12/h2,4,6H,1,3,5,7-8H2,(H2,13,14,15)	C1CC2=C(C1)C(NC1=NCCN1)=CC=C2	C12H15N3
Ketamine	2-(2-Chlorophenyl)-2-(methylamino)cyclohexan-1-one	6740-88-1	YQEZLKZALYSWHR-UHFFFAOYSA-N	InChI=1/C13H16ClNO/c1-15-13(9-5-4-8-12(13)16)10-6-2-3-7-11(10)14/h2-3,6-7,15H,4-5,8-9H2,1H3	CNC1(CCCCC1=O)C1=C(Cl)C=CC=C1	C13H16ClNO
Ketoprofen	2-(3-Benzoylphenyl)propanoic acid	22071-15-4	DKYWVDODHFEZIM-UHFFFAOYSA-N	InChI=1/C16H14O3/c1-11(16(18)19)13-8-5-9-14(10-13)15(17)12-6-3-2-4-7-12/h2-11H,1H3,(H,18,19)	CC(C(O)=O)C1=CC(=CC=C1)C(=O)C1=CC=CC=C1	C16H14O3
Lamotrigine	6-(2,3-Dichlorophenyl)-1,2,4-triazine-3,5-diamine	84057-84-1	PYZRQGJRPPTADH-UHFFFAOYSA-N	InChI=1S/C9H7Cl2N5/c10-5-3-1-2-4(6(5)11)7-8(12)14-9(13)16-15-7/h1-3H,(H4,12,13,14,16)	NC1=NC(N)=C(N=N1)C1=CC=CC(Cl)=C1Cl	C9H7Cl2N5
Levetiracetam	(2S)-2-(2-Oxopyrrolidin-1-yl)butanamide	102767-28-2	HPHUVLMMVZITSG-LURJTMIESA-N	InChI=1S/C8H14N2O2/c1-2-6(8(9)12)10-5-3-4-7(10)11/h6H,2-5H2,1H3,(H2,9,12)/t6-/m0/s1	CCC(N1CCCC1=O)C(N)=O	C8H14N2O2
Levomepromazine	(2R)-3-(2-Methoxy-10H-phenothiazin-10-yl)-N,N,2-trimethylpropan-1-amine	60-99-1	VRQVVMDWGGWHTJ-CQSZACIVSA-N	InChI=1S/C19H24N2OS/c1-14(12-20(2)3)13-21-16-7-5-6-8-18(16)23-19-10-9-15(22-4)11-17(19)21/h5-11,14H,12-13H2,1-4H3/t14-/m1/s1	COC1=CC2=C(SC3=C(C=CC=C3)N2CC(C)CN(C)C)C=C1	C19H24N2OS
Lidocaine	N-(2,6-Dimethylphenyl)-N~2~,N~2~-diethylglycinamide	137-58-6	NNJVILVZKWQKPM-UHFFFAOYSA-N	InChI=1S/C14H22N2O/c1-5-16(6-2)10-13(17)15-14-11(3)8-7-9-12(14)4/h7-9H,5-6,10H2,1-4H3,(H,15,17)	CCN(CC)CC(=O)NC1=C(C)C=CC=C1C	C14H22N2O
Lormetazepam	7-Chloro-5-(2-chlorophenyl)-3-hydroxy-1-methyl-1,3-dihydro-2H-1,4-benzodiazepin-2-one	848-75-9	FJIKWRGCXUCUIG-UHFFFAOYSA-N	InChI=1/C16H12Cl2N2O2/c1-20-13-7-6-9(17)8-11(13)14(19-15(21)16(20)22)10-4-2-3-5-12(10)18/h2-8,15,21H,1H3	CN1C2=CC=C(Cl)C=C2C(=NC(O)C1=O)C1=CC=CC=C1Cl	C16H12Cl2N2O2
Methylperone	1-(4-Fluorophenyl)-4-(4-methylpiperidin-1-yl)butan-1-one	3575-80-2	DKMFBWQBDIGMHM-UHFFFAOYSA-N	InChI=1S/C16H22FNO/c1-13-8-11-18(12-9-13)10-2-3-16(19)14-4-6-15(17)7-5-14/h4-7,13H,2-3,8-12H2,1H3	CC1CCN(CCCC(=O)C2=CC=C(F)C=C2)CC1	C16H22FNO
Meperidine	Ethyl 1-methyl-4-phenylpiperidine-4-carboxylate	57-42-1	XADCESSVHJOZHK-UHFFFAOYSA-N	InChI=1S/C15H21NO2/c1-3-18-14(17)15(9-11-16(2)12-10-15)13-7-5-4-6-8-13/h4-8H,3,9-12H2,1-2H3	CCOC(=O)C1(CCN(C)CC1)C1=CC=CC=C1	C15H21NO2
Mepivacaine	N-(2,6-Dimethylphenyl)-1-methylpiperidine-2-carboxamide	96-88-8	INWLQCZOYSRPNW-UHFFFAOYSA-N	InChI=1/C15H22N2O/c1-11-7-6-8-12(2)14(11)16-15(18)13-9-4-5-10-17(13)3/h6-8,13H,4-5,9-10H2,1-3H3,(H,16,18)	CN1CCCCC1C(=O)NC1=C(C)C=CC=C1C	C15H22N2O
Methadone	6-(Dimethylamino)-4,4-diphenylheptan-3-one	76-99-3	USSIQXCVUWKGNF-UHFFFAOYSA-N	InChI=1/C21H27NO/c1-5-20(23)21(16-17(2)22(3)4,18-12-8-6-9-13-18)19-14-10-7-11-15-19/h6-15,17H,5,16H2,1-4H3	CCC(=O)C(CC(C)N(C)C)(C1=CC=CC=C1)C1=CC=CC=C1	C21H27NO
Methamphetamine	(2S)-N-Methyl-1-phenylpropan-2-amine	537-46-2	MYWUZJCMWCOHBA-VIFPVBQESA-N	InChI=1S/C10H15N/c1-9(11-2)8-10-6-4-3-5-7-10/h3-7,9,11H,8H2,1-2H3/t9-/m0/s1	CNC(C)CC1=CC=CC=C1	C10H15N
Methaqualone	2-Methyl-3-(2-methylphenyl)quinazolin-4(3H)-one	72-44-6	JEYCTXHKTXCGPB-UHFFFAOYSA-N	InChI=1S/C16H14N2O/c1-11-7-3-6-10-15(11)18-12(2)17-14-9-5-4-8-13(14)16(18)19/h3-10H,1-2H3	CC1=C(C=CC=C1)N1C(C)=NC2=CC=CC=C2C1=O	C16H14N2O
Methylphenidate	Methyl phenyl(piperidin-2-yl)acetate	113-45-1	DUGOZIWVEXMGBE-UHFFFAOYSA-N	InChI=1/C14H19NO2/c1-17-14(16)13(11-7-3-2-4-8-11)12-9-5-6-10-15-12/h2-4,7-8,12-13,15H,5-6,9-10H2,1H3	COC(=O)C(C1CCCCN1)C1=CC=CC=C1	C14H19NO2
Metoclopramide	4-Amino-5-chloro-N-[2-(diethylamino)ethyl]-2-methoxybenzamide	364-62-5	TTWJBBZEZQICBI-UHFFFAOYSA-N	InChI=1S/C14H22ClN3O2/c1-4-18(5-2)7-6-17-14(19)10-8-11(15)12(16)9-13(10)20-3/h8-9H,4-7,16H2,1-3H3,(H,17,19)	CCN(CC)CCNC(=O)C1=CC(Cl)=C(N)C=C1OC	C14H22ClN3O2
Metoprolol	1-[4-(2-Methoxyethyl)phenoxy]-3-[(propan-2-yl)amino]propan-2-ol	51384-51-1	IUBSYMUCCVWXPE-UHFFFAOYSA-N	InChI=1/C15H25NO3/c1-12(2)16-10-14(17)11-19-15-6-4-13(5-7-15)8-9-18-3/h4-7,12,14,16-17H,8-11H2,1-3H3	COCCC1=CC=C(OCC(O)CNC(C)C)C=C1	C15H25NO3
Mianserin	2-Methyl-1,2,3,4,10,14b-hexahydrodibenzo[c,f]pyrazino[1,2-a]azepine	24219-97-4	UEQUQVLFIPOEMF-UHFFFAOYSA-N	InChI=1/C18H20N2/c1-19-10-11-20-17-9-5-3-7-15(17)12-14-6-2-4-8-16(14)18(20)13-19/h2-9,18H,10-13H2,1H3	CN1CCN2C(C1)C1=CC=CC=C1CC1=C2C=CC=C1	C18H20N2
Midazolam	8-Chloro-6-(2-fluorophenyl)-1-methyl-4H-imidazo[1,5-a][1,4]benzodiazepine	59467-70-8	DDLIGBOFAVUZHB-UHFFFAOYSA-N	InChI=1S/C18H13ClFN3/c1-11-21-9-13-10-22-18(14-4-2-3-5-16(14)20)15-8-12(19)6-7-17(15)23(11)13/h2-9H,10H2,1H3	CC1=NC=C2CN=C(C3=CC=CC=C3F)C3=CC(Cl)=CC=C3N12	C18H13ClFN3
Mirtazapine	2-Methyl-1,2,3,4,10,14b-hexahydropyrazino[2,1-a]pyrido[2,3-c][2]benzazepine	61337-67-5	RONZAEMNMFQXRA-UHFFFAOYSA-N	InChI=1/C17H19N3/c1-19-9-10-20-16(12-19)15-7-3-2-5-13(15)11-14-6-4-8-18-17(14)20/h2-8,16H,9-12H2,1H3	CN1CCN2C(C1)C1=CC=CC=C1CC1=C2N=CC=C1	C17H19N3
Morphine	17-Methyl-5alpha-7,8-didehydro-4,5-epoxymorphinan-3,6alpha-diol	57-27-2	BQJCRHHNABKAKU-KBQPJGBKSA-N	InChI=1S/C17H19NO3/c1-18-7-6-17-10-3-5-13(20)16(17)21-15-12(19)4-2-9(14(15)17)8-11(10)18/h2-5,10-11,13,16,19-20H,6-8H2,1H3/t10-,11+,13-,16-,17-/m0/s1	[H]C12CC3=C4C(OC5C(O)C=CC1C45CCN2C)=C(O)C=C3	C17H19NO3
Naloxone	3,14-Dihydroxy-17-(prop-2-en-1-yl)-5alpha-4,5-epoxymorphinan-6-one	465-65-6	UZHSEJADLWPNLE-GRGSLBFTSA-N	InChI=1S/C19H21NO4/c1-2-8-20-9-7-18-15-11-3-4-12(21)16(15)24-17(18)13(22)5-6-19(18,23)14(20)10-11/h2-4,14,17,21,23H,1,5-10H2/t14-,17+,18+,19-/m1/s1	C=CCN1CCC23C4C(=O)CCC2(C1CC5=C3C(=C(C=C5)O)O4)O	C19H21NO4
Naproxen	(2S)-2-(6-Methoxynaphthalen-2-yl)propanoic acid	22204-53-1	CMWTZPSULFXXJA-VIFPVBQESA-N	InChI=1S/C14H14O3/c1-9(14(15)16)10-3-4-12-8-13(17-2)6-5-11(12)7-10/h3-9H,1-2H3,(H,15,16)/t9-/m0/s1	COC1=CC2=CC=C(C=C2C=C1)C(C)C(O)=O	C14H14O3
Nitrazepam	7-Nitro-5-phenyl-1,3-dihydro-2H-1,4-benzodiazepin-2-one	146-22-5	KJONHKAYOJNZEC-UHFFFAOYSA-N	InChI=1S/C15H11N3O3/c19-14-9-16-15(10-4-2-1-3-5-10)12-8-11(18(20)21)6-7-13(12)17-14/h1-8H,9H2,(H,17,19)	[O-][N+](=O)C1=CC=C2NC(=O)CN=C(C3=CC=CC=C3)C2=C1	C15H11N3O3
Nortriptyline	3-(10,11-Dihydro-5H-dibenzo[a,d][7]annulen-5-ylidene)-N-methylpropan-1-amine	72-69-5	PHVGLTMQBUFIQQ-UHFFFAOYSA-N	InChI=1S/C19H21N/c1-20-14-6-11-19-17-9-4-2-7-15(17)12-13-16-8-3-5-10-18(16)19/h2-5,7-11,20H,6,12-14H2,1H3	CNCCC=C1C2=C(CCC3=C1C=CC=C3)C=CC=C2	C19H21N
Noscapine	(3S)-6,7-Dimethoxy-3-[(5R)-4-methoxy-6-methyl-5,6,7,8-tetrahydro-2H-[1,3]dioxolo[4,5-g]isoquinolin-5-yl]-2-benzofuran-1(3H)-one	128-62-1	AKNNEGZIBPJZJG-MSOLQXFVSA-N	InChI=1S/C22H23NO7/c1-23-8-7-11-9-14-20(29-10-28-14)21(27-4)15(11)17(23)18-12-5-6-13(25-2)19(26-3)16(12)22(24)30-18/h5-6,9,17-18H,7-8,10H2,1-4H3/t17-,18+/m1/s1	COC1=CC=C2C(OC(=O)C2=C1OC)C1N(C)CCC2=C1C(OC)=C1OCOC1=C2	C22H23NO7
Olanzapine	2-Methyl-4-(4-methylpiperazin-1-yl)-10H-thieno[2,3-b][1,5]benzodiazepine	132539-06-1	KVWDHTXUZHCGIO-UHFFFAOYSA-N	InChI=1S/C17H20N4S/c1-12-11-13-16(21-9-7-20(2)8-10-21)18-14-5-3-4-6-15(14)19-17(13)22-12/h3-6,11,19H,7-10H2,1-2H3	CN1CCN(CC1)C1=NC2=C(NC3=C1C=C(C)S3)C=CC=C2	C17H20N4S
Opipramol	2-{4-[3-(5H-Dibenzo[b,f]azepin-5-yl)propyl]piperazin-1-yl}ethan-1-ol	315-72-0	YNZFUWZUGRBMHL-UHFFFAOYSA-N	InChI=1S/C23H29N3O/c27-19-18-25-16-14-24(15-17-25)12-5-13-26-22-8-3-1-6-20(22)10-11-21-7-2-4-9-23(21)26/h1-4,6-11,27H,5,12-19H2	OCCN1CCN(CCCN2C3=CC=CC=C3C=CC3=C2C=CC=C3)CC1	C23H29N3O
Oxazepam	7-Chloro-3-hydroxy-5-phenyl-1,3-dihydro-1,4-benzodiazepin-2-one	604-75-1	ADIMAYPTOBDMTL-UHFFFAOYSA-N	InChI=1S/C15H11ClN2O2/c16-10-6-7-12-11(8-10)13(9-4-2-1-3-5-9)18-15(20)14(19)17-12/h1-8,15,20H,(H,17,19)	C1=CC=C(C=C1)C2=NC(C(=O)NC3=C2C=C(C=C3)Cl)O	C15H11ClN2O2
Oxprenolol	1-[(Propan-2-yl)amino]-3-{2-[(prop-2-en-1-yl)oxy]phenoxy}propan-2-ol	6452-71-7	CEMAWMOMDPGJMB-UHFFFAOYSA-N	InChI=1/C15H23NO3/c1-4-9-18-14-7-5-6-8-15(14)19-11-13(17)10-16-12(2)3/h4-8,12-13,16-17H,1,9-11H2,2-3H3	CC(C)NCC(O)COC1=CC=CC=C1OCC=C	C15H23NO3
Oxycodone	14-Hydroxy-3-methoxy-17-methyl-5alpha-4,5-epoxymorphinan-6-one	76-42-6	BRUQQQPBMZOVGD-XFKAJCMBSA-N	InChI=1S/C18H21NO4/c1-19-8-7-17-14-10-3-4-12(22-2)15(14)23-16(17)11(20)5-6-18(17,21)13(19)9-10/h3-4,13,16,21H,5-9H2,1-2H3/t13-,16+,17+,18-/m1/s1	[H]C12OC3=C(OC)C=CC4=C3C11CCN(C)C(C4)C1(O)CCC2=O	C18H21NO4
Papaverine	1-[(3,4-Dimethoxyphenyl)methyl]-6,7-dimethoxyisoquinoline	58-74-2	XQYZDYMELSJDRZ-UHFFFAOYSA-N	InChI=1S/C20H21NO4/c1-22-17-6-5-13(10-18(17)23-2)9-16-15-12-20(25-4)19(24-3)11-14(15)7-8-21-16/h5-8,10-12H,9H2,1-4H3	COC1=CC=C(CC2=NC=CC3=CC(OC)=C(OC)C=C23)C=C1OC	C20H21NO4
Pentobarbital	5-Ethyl-2-hydroxy-5-(pentan-2-yl)pyrimidine-4,6(1H,5H)-dione	76-74-4	WEXRUCMBJFQVBZ-UHFFFAOYSA-N	InChI=1/C11H18N2O3/c1-4-6-7(3)11(5-2)8(14)12-10(16)13-9(11)15/h7H,4-6H2,1-3H3,(H2,12,13,14,15,16)	CCCC(C)C1(CC)C(=O)NC(O)=NC1=O	C11H18N2O3
Phenacetin	N-(4-Ethoxyphenyl)acetamide	62-44-2	CPJSUEIXXCENMM-UHFFFAOYSA-N	InChI=1S/C10H13NO2/c1-3-13-10-6-4-9(5-7-10)11-8(2)12/h4-7H,3H2,1-2H3,(H,11,12)	CCOC1=CC=C(NC(C)=O)C=C1	C10H13NO2
Pheniramine	N,N-Dimethyl-3-phenyl-3-(pyridin-2-yl)propan-1-amine	86-21-5	IJHNSHDBIRRJRN-UHFFFAOYSA-N	InChI=1/C16H20N2/c1-18(2)13-11-15(14-8-4-3-5-9-14)16-10-6-7-12-17-16/h3-10,12,15H,11,13H2,1-2H3	CN(C)CCC(C1=CC=CC=C1)C1=NC=CC=C1	C16H20N2
Phenylephrine	3-[(1R)-1-hydroxy-2-(methylamino)ethyl]phenol	59-42-7	SONNWYBIRXJNDC-VIFPVBQESA-N	InChI=1S/C9H13NO2/c1-10-6-9(12)7-3-2-4-8(11)5-7/h2-5,9-12H,6H2,1H3/t9-/m0/s1	CNCC(C1=CC(=CC=C1)O)O	C9H13NO2
Pholcodine	17-Methyl-3-[2-(morpholin-4-yl)ethoxy]-5alpha-7,8-didehydro-4,5-epoxymorphinan-6alpha-ol	509-67-1	GPFAJKDEDBRFOS-FKQDBXSBSA-N	InChI=1S/C23H30N2O4/c1-24-7-6-23-16-3-4-18(26)22(23)29-21-19(5-2-15(20(21)23)14-17(16)24)28-13-10-25-8-11-27-12-9-25/h2-5,16-18,22,26H,6-14H2,1H3/t16-,17+,18-,22-,23-/m0/s1	CN1CCC23C4OC5=C(OCCN6CCOCC6)C=CC(CC1C2C=CC4O)=C35	C23H30N2O4
Pholedrine	4-[2-(methylamino)propyl]phenol	370-14-9	SBUQZKJEOOQSBV-UHFFFAOYSA-N	InChI=1S/C10H15NO/c1-8(11-2)7-9-3-5-10(12)6-4-9/h3-6,8,11-12H,7H2,1-2H3	CC(CC1=CC=C(C=C1)O)NC	C10H15NO
Piroxicam	4-Hydroxy-2-methyl-1,1-dioxo-N-(pyridin-2-yl)-1,2-dihydro-1lambda~6~,2-benzothiazine-3-carboxamide	36322-90-4	QYSPLQLAKJAUJT-UHFFFAOYSA-N	InChI=1S/C15H13N3O4S/c1-18-13(15(20)17-12-8-4-5-9-16-12)14(19)10-6-2-3-7-11(10)23(18,21)22/h2-9,19H,1H3,(H,16,17,20)	CN1C(C(=O)NC2=NC=CC=C2)C(=O)C2=C(C=CC=C2)S1(=O)=O	C15H13N3O4S
Pregabalin	(3S)-3-(Aminomethyl)-5-methylhexanoic acid	148553-50-8	AYXYPKUFHZROOJ-ZETCQYMHSA-N	InChI=1S/C8H17NO2/c1-6(2)3-7(5-9)4-8(10)11/h6-7H,3-5,9H2,1-2H3,(H,10,11)/t7-/m0/s1	CC(C)CC(CN)CC(O)=O	C8H17NO2
Procaine	2-(Diethylamino)ethyl 4-aminobenzoate	59-46-1	MFDFERRIHVXMIY-UHFFFAOYSA-N	InChI=1S/C13H20N2O2/c1-3-15(4-2)9-10-17-13(16)11-5-7-12(14)8-6-11/h5-8H,3-4,9-10,14H2,1-2H3	CCN(CC)CCOC(=O)C1=CC=C(N)C=C1	C13H20N2O2
Propofol	2,6-Di(propan-2-yl)phenol	2078-54-8	OLBCVFGFOZPWHH-UHFFFAOYSA-N	InChI=1S/C12H18O/c1-8(2)10-6-5-7-11(9(3)4)12(10)13/h5-9,13H,1-4H3	CC(C)C1=CC=CC(C(C)C)=C1O	C12H18O
Prothipendyl	N,N-Dimethyl-3-(10H-pyrido[3,2-b][1,4]benzothiazin-10-yl)propan-1-amine	303-69-5	JTTAUPUMOLRVRA-UHFFFAOYSA-N	InChI=1S/C16H19N3S/c1-18(2)11-6-12-19-13-7-3-4-8-14(13)20-15-9-5-10-17-16(15)19/h3-5,7-10H,6,11-12H2,1-2H3	CN(C)CCCN1C2=CC=CC=C2SC2=C1N=CC=C2	C16H19N3S
Quetiapine	2-{2-[4-(Dibenzo[b,f][1,4]thiazepin-11-yl)piperazin-1-yl]ethoxy}ethan-1-ol	111974-69-7	URKOMYMAXPYINW-UHFFFAOYSA-N	InChI=1S/C21H25N3O2S/c25-14-16-26-15-13-23-9-11-24(12-10-23)21-17-5-1-3-7-19(17)27-20-8-4-2-6-18(20)22-21/h1-8,25H,9-16H2	OCCOCCN1CCN(CC1)C1=NC2=C(SC3=C1C=CC=C3)C=CC=C2	C21H25N3O2S
Quinine	(9R)-6'-Methoxy-8alpha-cinchonan-9-ol	130-95-0	LOUPRKONTZGTKE-WZBLMQSHSA-N	InChI=1S/C20H24N2O2/c1-3-13-12-22-9-7-14(13)10-19(22)20(23)16-6-8-21-18-5-4-15(24-2)11-17(16)18/h3-6,8,11,13-14,19-20,23H,1,7,9-10,12H2,2H3/t13-,14-,19-,20+/m0/s1	COC1=CC2=C(C=CN=C2C=C1)C(O)C1CC2CCN1CC2C=C	C20H24N2O2
Sertraline	(1S,4S)-4-(3,4-Dichlorophenyl)-N-methyl-1,2,3,4-tetrahydronaphthalen-1-amine	79617-96-2	VGKDLMBJGBXTGI-SJCJKPOMSA-N	InChI=1S/C17H17Cl2N/c1-20-17-9-7-12(13-4-2-3-5-14(13)17)11-6-8-15(18)16(19)10-11/h2-6,8,10,12,17,20H,7,9H2,1H3/t12-,17-/m0/s1	CNC1CCC(C2=CC(Cl)=C(Cl)C=C2)C2=C1C=CC=C2	C17H17Cl2N
Tetrazepam	7-Chloro-5-(cyclohex-1-en-1-yl)-1-methyl-1,3-dihydro-2H-1,4-benzodiazepin-2-one	10379-14-3	IQWYAQCHYZHJOS-UHFFFAOYSA-N	InChI=1S/C16H17ClN2O/c1-19-14-8-7-12(17)9-13(14)16(18-10-15(19)20)11-5-3-2-4-6-11/h5,7-9H,2-4,6,10H2,1H3	CN1C2=C(C=C(Cl)C=C2)C(=NCC1=O)C1=CCCCC1	C16H17ClN2O
Thiopental	5-Ethyl-5-(pentan-2-yl)-2-sulfanylpyrimidine-4,6(1H,5H)-dione	76-75-5	IUJDSEJGGMCXSG-UHFFFAOYSA-N	InChI=1/C11H18N2O2S/c1-4-6-7(3)11(5-2)8(14)12-10(16)13-9(11)15/h7H,4-6H2,1-3H3,(H2,12,13,14,15,16)	CCCC(C)C1(CC)C(=O)NC(S)=NC1=O	C11H18N2O2S
Ticlopidine	5-[(2-Chlorophenyl)methyl]-4,5,6,7-tetrahydrothieno[3,2-c]pyridine	55142-85-3	PHWBOXQYWZNQIN-UHFFFAOYSA-N	InChI=1S/C14H14ClNS/c15-13-4-2-1-3-11(13)9-16-7-5-14-12(10-16)6-8-17-14/h1-4,6,8H,5,7,9-10H2	ClC1=CC=CC=C1CN1CCC2=C(C1)C=CS2	C14H14ClNS
Topiramate	[(3aS,5aR,8aR,8bS)-2,2,7,7-Tetramethyltetrahydro-2H,3aH,7H-bis[1,3]dioxolo[4,5-b:4',5'-d]pyran-3a-yl]methyl sulfamate (non-preferred name)	97240-79-4	KJADKKWYZYXHBB-XBWDGYHZSA-N	InChI=1S/C12H21NO8S/c1-10(2)18-7-5-16-12(6-17-22(13,14)15)9(8(7)19-10)20-11(3,4)21-12/h7-9H,5-6H2,1-4H3,(H2,13,14,15)/t7-,8-,9+,12+/m1/s1	CC1(C)OC2COC3(COS(N)(=O)=O)OC(C)(C)OC3C2O1	C12H21NO8S
Tramadol	rel-(1R,2R)-2-[(Dimethylamino)methyl]-1-(3-methoxyphenyl)cyclohexan-1-ol	27203-92-5	TVYLLZQTGLZFBW-ZBFHGGJFSA-N	InChI=1/C16H25NO2/c1-17(2)12-14-7-4-5-10-16(14,18)13-8-6-9-15(11-13)19-3/h6,8-9,11,14,18H,4-5,7,10,12H2,1-3H3/t14-,16+/s2	COC1=CC=CC(=C1)C1(O)CCCCC1CN(C)C	C16H25NO2
Trazodone	2-{3-[4-(3-Chlorophenyl)piperazin-1-yl]propyl}[1,2,4]triazolo[4,3-a]pyridin-3(2H)-one	19794-93-5	PHLBKPHSAVXXEF-UHFFFAOYSA-N	InChI=1S/C19H22ClN5O/c20-16-5-3-6-17(15-16)23-13-11-22(12-14-23)8-4-10-25-19(26)24-9-2-1-7-18(24)21-25/h1-3,5-7,9,15H,4,8,10-14H2	ClC1=CC=CC(=C1)N1CCN(CCCN2N=C3C=CC=CN3C2=O)CC1	C19H22ClN5O
Venlafaxine	1-[2-(Dimethylamino)-1-(4-methoxyphenyl)ethyl]cyclohexan-1-ol	93413-69-5	PNVNVHUZROJLTJ-UHFFFAOYSA-N	InChI=1/C17H27NO2/c1-18(2)13-16(17(19)11-5-4-6-12-17)14-7-9-15(20-3)10-8-14/h7-10,16,19H,4-6,11-13H2,1-3H3	COC1=CC=C(C=C1)C(CN(C)C)C1(O)CCCCC1	C17H27NO2
Verapamil	2-(3,4-Dimethoxyphenyl)-5-{[2-(3,4-dimethoxyphenyl)ethyl](methyl)amino}-2-(propan-2-yl)pentanenitrile	52-53-9	SGTNSNPWRIOYBX-UHFFFAOYSA-N	InChI=1/C27H38N2O4/c1-20(2)27(19-28,22-10-12-24(31-5)26(18-22)33-7)14-8-15-29(3)16-13-21-9-11-23(30-4)25(17-21)32-6/h9-12,17-18,20H,8,13-16H2,1-7H3	COC1=CC=C(CCN(C)CCCC(C#N)(C(C)C)C2=CC=C(OC)C(OC)=C2)C=C1OC	C27H38N2O4
Xipamide	4-Chloro-N-(2,6-dimethylphenyl)-2-hydroxy-5-sulfamoylbenzamide	14293-44-8	MTZBBNMLMNBNJL-UHFFFAOYSA-N	InChI=1S/C15H15ClN2O4S/c1-8-4-3-5-9(2)14(8)18-15(20)10-6-13(23(17,21)22)11(16)7-12(10)19/h3-7,19H,1-2H3,(H,18,20)(H2,17,21,22)	CC1=CC=CC(C)=C1NC(=O)C1=CC(=C(Cl)C=C1O)S(N)(=O)=O	C15H15ClN2O4S
Xylometazoline	2-[(4-tert-Butyl-2,6-dimethylphenyl)methyl]-4,5-dihydro-1H-imidazole	526-36-3	HUCJFAOMUPXHDK-UHFFFAOYSA-N	InChI=1S/C16H24N2/c1-11-8-13(16(3,4)5)9-12(2)14(11)10-15-17-6-7-18-15/h8-9H,6-7,10H2,1-5H3,(H,17,18)	CC1=CC(=CC(C)=C1CC1=NCCN1)C(C)(C)C	C16H24N2
Zolpidem	N,N-Dimethyl-2-[6-methyl-2-(4-methylphenyl)imidazo[1,2-a]pyridin-3-yl]acetamide	82626-48-0	ZAFYATHCZYHLPB-UHFFFAOYSA-N	InChI=1S/C19H21N3O/c1-13-5-8-15(9-6-13)19-16(11-18(23)21(3)4)22-12-14(2)7-10-17(22)20-19/h5-10,12H,11H2,1-4H3	CN(C)C(=O)CC1=C(N=C2C=CC(C)=CN12)C1=CC=C(C)C=C1	C19H21N3O

## Sheet: S2_Reference_standards
Table S2: Reference compounds used for additional compound annotation in plasma samples.
Name	IUPAC Name	CAS_RN	InChIKey	Standard InChI	SMILES	Molecular Formula
1-(3-Chlorophenyl)piperazine	1-(3-Chlorophenyl)piperazine	6640-24-0	VHFVKMTVMIZMIK-UHFFFAOYSA-N	InChI=1S/C10H13ClN2/c11-9-2-1-3-10(8-9)13-6-4-12-5-7-13/h1-3,8,12H,4-7H2	C1CN(CCN1)C2=CC(=CC=C2)Cl	C10H13ClN2
Anhydroecgonine	8-Methyl-8-azabicyclo[3.2.1]oct-2-ene-2-carboxylic acid	484-93-5	HZGRVVUQEIBCMS-UHFFFAOYSA-N	InChI=1S/C9H13NO2/c1-10-6-2-4-7(9(11)12)8(10)5-3-6/h4,6,8H,2-3,5H2,1H3,(H,11,12)	CN1C2CCC1C(=CC2)C(=O)O	C9H13NO2
Anhydromethylecgonine	Methyl 8-methyl-8-azabicyclo[3.2.1]oct-2-ene-2-carboxylate	127379-24-2	MPSNEAHFGOEKBI-UHFFFAOYSA-N	InChI=1S/C10H15NO2/c1-11-7-3-5-8(10(12)13-2)9(11)6-4-7/h5,7,9H,3-4,6H2,1-2H3	CN1C2CCC1C(=CC2)C(=O)OC	C10H15NO2
Baclofen	4-Amino-3-(4-chlorophenyl)butanoic acid	1134-47-0	KPYSYYIEGFHWSV-UHFFFAOYSA-N	InChI=1/C10H12ClNO2/c11-9-3-1-7(2-4-9)8(6-12)5-10(13)14/h1-4,8H,5-6,12H2,(H,13,14)	NCC(CC(O)=O)C1=CC=C(Cl)C=C1	C10H12ClNO2
Benzoylecgonine	(1R,2R,3S,5S)-3-(Benzoyloxy)-8-methyl-8-azabicyclo[3.2.1]octane-2-carboxylic acid	519-09-5	GVGYEFKIHJTNQZ-RFQIPJPRSA-N	InChI=1S/C16H19NO4/c1-17-11-7-8-12(17)14(15(18)19)13(9-11)21-16(20)10-5-3-2-4-6-10/h2-6,11-14H,7-9H2,1H3,(H,18,19)/t11-,12+,13-,14+/m0/s1	CN1[C@H]2CC[C@@H]1[C@H]([C@H](C2)OC(=O)C1=CC=CC=C1)C(O)=O	C16H19NO4
Cannabidiol	(1'R,2'R)-5'-Methyl-4-pentyl-2'-(prop-1-en-2-yl)-1',2',3',4'-tetrahydro[1,1'-biphenyl]-2,6-diol	13956-29-1	QHMBSVQNZZTUGM-ZWKOTPCHSA-N	InChI=1S/C21H30O2/c1-5-6-7-8-16-12-19(22)21(20(23)13-16)18-11-15(4)9-10-17(18)14(2)3/h11-13,17-18,22-23H,2,5-10H2,1,3-4H3/t17-,18+/m0/s1	CCCCCC1=CC(O)=C([C@@H]2C=C(C)CC[C@H]2C(C)=C)C(O)=C1	C21H30O2
Cinnamoylcocaine	Methyl (1R,2R,3S,5S)-8-methyl-3-{[(2E)-3-phenylprop-2-enoyl]oxy}-8-azabicyclo[3.2.1]octane-2-carboxylate	521-67-5	MQIXMJWNEKUAOZ-UIBIWLFHSA-N	InChI=1S/C19H23NO4/c1-20-14-9-10-15(20)18(19(22)23-2)16(12-14)24-17(21)11-8-13-6-4-3-5-7-13/h3-8,11,14-16,18H,9-10,12H2,1-2H3/t14-,15+,16-,18+/m0/s1	COC(=O)[C@@H]1[C@H]2CC[C@@H](C[C@@H]1OC(=O)C=CC1=CC=CC=C1)N2C	C19H23NO4
Clonazepam	5-(2-Chlorophenyl)-7-nitro-1,3-dihydro-2H-1,4-benzodiazepin-2-one	1622-61-3	DGBIGWXXNGSACT-UHFFFAOYSA-N	InChI=1S/C15H10ClN3O3/c16-12-4-2-1-3-10(12)15-11-7-9(19(21)22)5-6-13(11)18-14(20)8-17-15/h1-7H,8H2,(H,18,20)	[O-][N+](=O)C1=CC2=C(NC(=O)CN=C2C2=CC=CC=C2Cl)C=C1	C15H10ClN3O3
Cocaethylene	Ethyl (1R,2R,3S,5S)-3-(benzoyloxy)-8-methyl-8-azabicyclo[3.2.1]octane-2-carboxylate	529-38-4	NMPOSNRHZIWLLL-XUWVNRHRSA-N	InChI=1S/C18H23NO4/c1-3-22-18(21)16-14-10-9-13(19(14)2)11-15(16)23-17(20)12-7-5-4-6-8-12/h4-8,13-16H,3,9-11H2,1-2H3/t13-,14+,15-,16+/m0/s1	CCOC(=O)[C@@H]1[C@H]2CC[C@@H](C[C@@H]1OC(=O)C1=CC=CC=C1)N2C	C18H23NO4
Cyprodinil	4-Cyclopropyl-6-methyl-N-phenylpyrimidin-2-amine	121552-61-2	HAORKNGNJCEJBX-UHFFFAOYSA-N	InChI=1S/C14H15N3/c1-10-9-13(11-7-8-11)17-14(15-10)16-12-5-3-2-4-6-12/h2-6,9,11H,7-8H2,1H3,(H,15,16,17)	CC1=NC(NC2=CC=CC=C2)=NC(=C1)C1CC1	C14H15N3
Methyl ecgonine	Methyl (1R,2R,3S,5S)-3-hydroxy-8-methyl-8-azabicyclo[3.2.1]octane-2-carboxylate	7143-09-1	QIQNNBXHAYSQRY-UYXSQOIJSA-N	InChI=1S/C10H17NO3/c1-11-6-3-4-7(11)9(8(12)5-6)10(13)14-2/h6-9,12H,3-5H2,1-2H3/t6-,7+,8-,9+/m0/s1	CN1C2CCC1C(C(C2)O)C(=O)OC	C10H17NO3
Ethyl ecgonine	Ethyl (1R,2R,3S,5S)-3-hydroxy-8-methyl-8-azabicyclo[3.2.1]octane-2-carboxylate	70939-97-8	ABDMBNAKYBUEEX-QCLAVDOMSA-N	InChI=1S/C11H19NO3/c1-3-15-11(14)10-8-5-4-7(12(8)2)6-9(10)13/h7-10,13H,3-6H2,1-2H3/t7-,8+,9-,10+/m0/s1	CCOC(=O)C1C2CCC(N2C)CC1O	C11H19NO3
Fentanyl	N-Phenyl-N-[1-(2-phenylethyl)piperidin-4-yl]propanamide	437-38-7	PJMPHNIQZUBGLI-UHFFFAOYSA-N	InChI=1S/C22H28N2O/c1-2-22(25)24(20-11-7-4-8-12-20)21-14-17-23(18-15-21)16-13-19-9-5-3-6-10-19/h3-12,21H,2,13-18H2,1H3	CCC(=O)N(C1CCN(CCC2=CC=CC=C2)CC1)C1=CC=CC=C1	C22H28N2O
Levamisole	(6S)-6-Phenyl-2,3,5,6-tetrahydroimidazo[2,1-b][1,3]thiazole	14769-73-4	HLFSDGLLUJUHTE-SNVBAGLBSA-N	InChI=1S/C11H12N2S/c1-2-4-9(5-3-1)10-8-13-6-7-14-11(13)12-10/h1-5,10H,6-8H2/t10-/m1/s1	C1CN2C[C@@H](N=C2S1)C1=CC=CC=C1	C11H12N2S
Metformin	N,N-Dimethyltriimidodicarbonic diamide	657-24-9	XZWYZXLIPXDOLR-UHFFFAOYSA-N	InChI=1S/C4H11N5/c1-9(2)4(7)8-3(5)6/h1-2H3,(H5,5,6,7,8)	CN(C)C(=N)NC(N)=N	C4H11N5
Levomethotrimeprazine	(2R)-3-(2-Methoxy-10H-phenothiazin-10-yl)-N,N,2-trimethylpropan-1-amine	60-99-1	VRQVVMDWGGWHTJ-CQSZACIVSA-N	InChI=1S/C19H24N2OS/c1-14(12-20(2)3)13-21-16-7-5-6-8-18(16)23-19-10-9-15(22-4)11-17(19)21/h5-11,14H,12-13H2,1-4H3/t14-/m1/s1	COC1=CC2=C(SC3=C(C=CC=C3)N2C[C@H](C)CN(C)C)C=C1	C19H24N2OS
Desmethylcitalopram	1-(4-fluorophenyl)-1-[3-(methylamino)propyl]-3H-2-benzofuran-5-carbonitrile	62498-67-3	PTJADDMMFYXMMG-UHFFFAOYSA-N	InChI=1S/C19H19FN2O/c1-22-10-2-9-19(16-4-6-17(20)7-5-16)18-8-3-14(12-21)11-15(18)13-23-19/h3-8,11,22H,2,9-10,13H2,1H3	CNCCCC1(C2=C(CO1)C=C(C=C2)C#N)C3=CC=C(C=C3)F	C19H19FN2O
Norcocaine	Methyl (1R,2R,3S,5S)-3-(benzoyloxy)-8-azabicyclo[3.2.1]octane-2-carboxylate	18717-72-1	AYDBLCSLKNTEJL-RFQIPJPRSA-N	InChI=1S/C16H19NO4/c1-20-16(19)14-12-8-7-11(17-12)9-13(14)21-15(18)10-5-3-2-4-6-10/h2-6,11-14,17H,7-9H2,1H3/t11-,12+,13-,14+/m0/s1	COC(=O)[C@@H]1[C@H]2CC[C@@H](C[C@@H]1OC(=O)C1=CC=CC=C1)N2	C16H19NO4
Desmethyldiazepam	7-Chloro-5-phenyl-1,3-dihydro-2H-1,4-benzodiazepin-2-one	1088-11-5	AKPLHCDWDRPJGD-UHFFFAOYSA-N	InChI=1S/C15H11ClN2O/c16-11-6-7-13-12(8-11)15(17-9-14(19)18-13)10-4-2-1-3-5-10/h1-8H,9H2,(H,18,19)	ClC1=CC2=C(NC(=O)CN=C2C2=CC=CC=C2)C=C1	C15H11ClN2O
Desmethylsertraline	(1S,4S)-4-(3,4-Dichlorophenyl)-1,2,3,4-tetrahydronaphthalen-1-amine	87857-41-8	SRPXSILJHWNFMK-ZBEGNZNMSA-N	InChI=1S/C16H15Cl2N/c17-14-7-5-10(9-15(14)18)11-6-8-16(19)13-4-2-1-3-12(11)13/h1-5,7,9,11,16H,6,8,19H2/t11-,16-/m0/s1	N[C@H]1CC[C@@H](C2=CC(Cl)=C(Cl)C=C2)C2=CC=CC=C12	C16H15Cl2N
O-Desmethylvenlafaxine	4-[2-(Dimethylamino)-1-(1-hydroxycyclohexyl)ethyl]phenol	93413-62-8	KYYIDSXMWOZKMP-UHFFFAOYSA-N	InChI=1/C16H25NO2/c1-17(2)12-15(13-6-8-14(18)9-7-13)16(19)10-4-3-5-11-16/h6-9,15,18-19H,3-5,10-12H2,1-2H3	CN(C)CC(C1=CC=C(O)C=C1)C1(O)CCCCC1	C16H25NO2
Oxazepam	7-Chloro-3-hydroxy-5-phenyl-1,3-dihydro-2H-1,4-benzodiazepin-2-one	604-75-1	ADIMAYPTOBDMTL-UHFFFAOYSA-N	InChI=1/C15H11ClN2O2/c16-10-6-7-12-11(8-10)13(9-4-2-1-3-5-9)18-15(20)14(19)17-12/h1-8,15,20H,(H,17,19)	OC1N=C(C2=CC=CC=C2)C2=CC(Cl)=CC=C2NC1=O	C15H11ClN2O2
Pantoprazole	5-(Difluoromethoxy)-2-[(3,4-dimethoxypyridin-2-yl)methanesulfinyl]-1H-benzimidazole	102625-70-7	IQPSEEYGBUAQFF-UHFFFAOYSA-N	InChI=1/C16H15F2N3O4S/c1-23-13-5-6-19-12(14(13)24-2)8-26(22)16-20-10-4-3-9(25-15(17)18)7-11(10)21-16/h3-7,15H,8H2,1-2H3,(H,20,21)	COC1=C(OC)C(CS(=O)C2=NC3=C(N2)C=CC(OC(F)F)=C3)=NC=C1	C16H15F2N3O4S
Pralidoxime	2-[(E)-(Hydroxyimino)methyl]-1-methylpyridin-1-ium	6735-59-7	JBKPUQTUERUYQE-UHFFFAOYSA-O	InChI=1S/C7H8N2O/c1-9-5-3-2-4-7(9)6-8-10/h2-6H,1H3/p+1	C[N+]1=CC=CC=C1\C=N\O	C7H9N2O
Sitagliptin	(3R)-3-amino-1-[3-(trifluoromethyl)-6,8-dihydro-5H-[1,2,4]triazolo[4,3-a]pyrazin-7-yl]-4-(2,4,5-trifluorophenyl)butan-1-one	486460-32-6	MFFMDFFZMYYVKS-SECBINFHSA-N	InChI=1S/C16H15F6N5O/c17-10-6-12(19)11(18)4-8(10)3-9(23)5-14(28)26-1-2-27-13(7-26)24-25-15(27)16(20,21)22/h4,6,9H,1-3,5,7,23H2/t9-/m1/s1	C1CN2C(=NN=C2C(F)(F)F)CN1C(=O)CC(CC3=CC(=C(C=C3F)F)F)N	C16H15F6N5O
Temazepam	7-Chloro-3-hydroxy-1-methyl-5-phenyl-1,3-dihydro-2H-1,4-benzodiazepin-2-one	846-50-4	SEQDDYPDSLOBDC-UHFFFAOYSA-N	InChI=1/C16H13ClN2O2/c1-19-13-8-7-11(17)9-12(13)14(18-15(20)16(19)21)10-5-3-2-4-6-10/h2-9,15,20H,1H3	CN1C2=CC=C(Cl)C=C2C(=NC(O)C1=O)C1=CC=CC=C1	C16H13ClN2O2
Trimethoprim	5-[(3,4,5-Trimethoxyphenyl)methyl]pyrimidine-2,4-diamine	738-70-5	IEDVJHCEMCRBQM-UHFFFAOYSA-N	InChI=1S/C14H18N4O3/c1-19-10-5-8(6-11(20-2)12(10)21-3)4-9-7-17-14(16)18-13(9)15/h5-7H,4H2,1-3H3,(H4,15,16,17,18)	COC1=CC(CC2=CN=C(N)N=C2N)=CC(OC)=C1OC	C14H18N4O3
